# Subunit exchange enhances information retention by CaMKII in dendritic spines

Dilawar Singh and Upinder Singh Bhalla

National Centre for Biological Sciences Bangalore, Tata Institute of Fundamental Research

This manuscript was compiled on July 28, 2018

**Molecular bistables are strong candidates for long-term information storage, for example, in synaptic plasticity. CaMKII is a highly expressed synaptic protein which has been proposed to form a molecular bistable switch capable of maintaining its state for years despite protein turnover and stochastic noise. It has recently been shown that CaMKII holoenzymes exchange subunits among themselves. Here we used computational methods to analyze the effect of subunit exchange on the CaMKII pathway in the presence of diffusion in two different micro-environments, the Post Synaptic Density (PSD) and spine cytosol. We show that in the PSD, subunit exchange leads to coordinated switching and prolongs state stability of the fraction of CaMKII that is present in clusters; and underlies spreading of activation among the remaining CaMKII that is uniformly distributed. Subunit exchange increases the robustness of the CaMKII switch measured as range of bistability both with respect to protein phosphatase 1 (PP1) levels and protein turnover rates. In the phosphatase-rich spine cytosol, subunit exchange leads to slower decay of activity following calcium stimuli. We find that subunit exchange can explain two time-courses of CaMKII activity decay observed in recent experiments monitoring endogenous activity of CaMKII in the spine. Overall, CaMKII exhibits multiple timescales of activity in the synapse and subunit exchange enhances the information retention ability of CaMKII by improving the stability of its switching in the PSD, and by slowing the decay of its activity in the spine cytosol. The existence of diverse timescales in the synapse has important theoretical implications for memory storage in networks.**

Keywords: Memory Maintenance | CaMKII | Bistability | Subunit Exchange

## Introduction

Memories are believed to be stored in synapses, encoded as changes in synaptic strength (1–3). Long Term Potentiation (LTP), an activity dependent change in synaptic strength, is considered to be the primary post-synaptic memory mechanism (4, 5). Various behavioural experiments strongly suggest a critical role for CaMKII in induction of LTP (6, 7). In the CA1 region of Hippocampus, blocking CaMKII activity blocks the induction of LTP (8). After LTP induction, several other pathways including protein synthesis (9), clustering of receptors (10), receptor translocation (11) and PKM- $\zeta$  activation (12), have been suggested as mechanisms for long-term maintenance of synaptic state. Recent evidence from behavioural assays suggests that CaMKII may also be involved in long-term maintenance of memory (13) (but see (8)).

Any putative molecular mechanism involved in long-term maintenance of memory must be able to maintain its

### Significance Statement

Despite everyday forgetfulness, we can recall some memories years after they were formed. How are we able to protect some memories for so long? Previous work has shown that the abundant brain protein Calcium/calmodulin dependent protein Kinase II (CaMKII) can form a very stable binary switch which can store information for years. Building on this work, we analyzed the implications of a recently discovered phenomenon of subunit exchange on the state switching properties of CaMKII. In subunit exchange fragments of one CaMKII molecule detach and exchange with another. We discovered that this improves the information retention ability of CaMKII both in the context where it stores information for long times, and also where it integrates information over the timescale of minutes.

**Author contributions:** DS designed the project, carried out the simulations and wrote the paper. USB designed the project and wrote the paper.

**Author declaration:** The authors declare no conflict of interest.

To whom correspondence should be addressed. E-mail: [bhalla@ncbs.res.in](mailto:bhalla@ncbs.res.in)

state despite the potent resetting mechanisms of chemical noise and protein turnover. In the small volume of the synapse ( $\sim 0.02 \mu\text{m}^3$  (14)), the number of molecules involved in biochemical processes range from single digits to a few hundred, thereby increasing the effect of chemical noise. Lisman proposed that a kinase and its phosphatase could form a bistable molecular switch able to maintain its state for a very long time despite turnover (15). It has been shown by various mathematical models that CaMKII and its phosphatase PP1 may form a bistable switch (16, 17) which can retain its state for years despite stochastic chemical noise and protein turnover (18). Although there is experimental evidence that CaMKII/PP1 is bistable in *in vitro* settings (19, 20), experimental evidence for *in vivo* bistability is lacking. In spine cytosol, CaMKII has been shown not to act like a bistable switch but rather a leaky integrator of calcium activity (8). However, CaMKII may be bistable in special micro-environments such as the “core” PSD where it attaches to NMDA receptor (21, 22).

From computational perspective, the CaMKII/PP1 bistable system is an attractive candidate for memory storage (23). Bistability provides a plausible solution to the problem of state maintenance. Previous modeling work has shown that CaMKII/PP1 system may form a very stable switch despite protein turnover and stochastic noise in the small volume of the synapse (11). The stability increases exponentially with the number of holoenzymes (18). It is important to note that this model exhibits bistable behaviour only in a narrow range of PP1 concentrations in the PSD. This strict restriction may be met because phosphorylated CaMKII is protected from phosphatases in PSD except PP1 (24) which is tightly regulated in the PSD (25).

CaMKII has another remarkable property which was hypothesized by Lisman (26) but discovered only recently, namely, subunit exchange. In this process, two CaMKII holoenzymes can exchange active subunits leading to spread of CaMKII activation (27).

In this paper, we adapt the model of Miller and Zhabotinsky (MZ) (18) to include subunit exchange and diffusion, and quantify the effects of subunit exchange on the properties of the CaMKII-PP1 system in two adjacent neuronal micro-environments: PSD and spine cytosol.

In the PSD, PP1 is tightly regulated and CaMKII is protected from other phosphatases. In the spine cytosol, CaMKII is accessible to other phosphatases along with PP1. We examine how state switching lifetimes in the PSD are affected by subunit exchange in different contexts of PP1 levels, turnover, and clustering of CaMKII. In the spine cytosol we show how the integration of calcium stimuli generates two time-courses of CaMKII activity as a result of subunit exchange (8).

## Results

**Model validation.** The basic computational units in our model are individual CaMKII subunits and a CaMKII ring consisting of 6 or 7 CaMKII subunits. We treat the CaMKII ring as a proxy for the CaMKII holoenzyme, which consists of two such rings stacked over each other (28, 29). In our model, CaMKII exists in 15 possible states compared to 2 in (18) (see [Materials and Methods](#)). This leads to many more reactions than the MZ model. Since analytical comparison of the two models was not possible, we first compared numerical results from our model without diffusion and without subunit exchange with the MZ model (Fig. 1).

Our model exhibited all the key properties of the MZ model: 1. CaMKII/PP1 under basal calcium stimulus conditions formed a bistable switch in the PSD (Fig. 1C, D), 2. The stability of the switch increased exponentially with system size (Fig. 1E), 3) Increased number of PP1 molecules ( $N_{\text{PP1}}$ ) shut off the switch (Fig. 2), and 4. bistability was robust to slow turnover of CaMKII (Fig. 3).

Thus, our baseline model exhibited all the key properties that have previously been predicted for the bistable CaMKII switch. However, the subunit exchange and diffusion introduce several interesting additional properties, which we examine now.

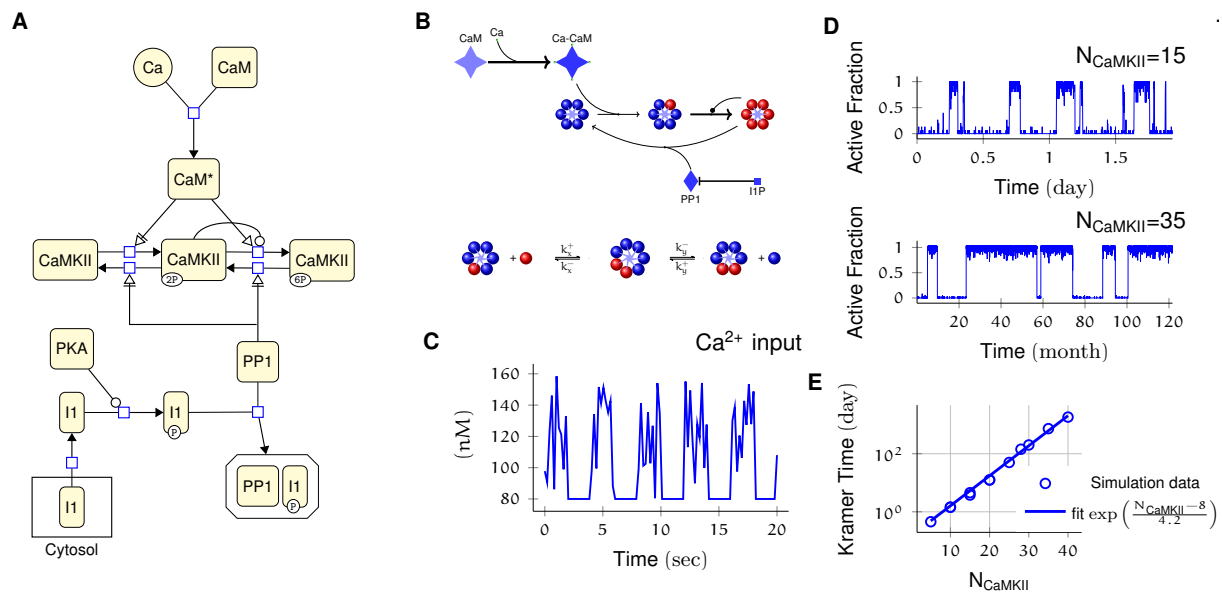

**Fig. 1.** Model description and validation. **(A)** CaMKII/PP1 pathway described in System Biology Graphical Notation (SBGN) - Process Description (PD) Language (30). **(B) (above)** Major chemical reactions in the CaMKII/PP1 pathway. **(below)** Subunit exchange between two CaMKII holoenzymes. Red and blue balls represent phosphorylated and un-phosphorylated subunits respectively. **(C)** Basal calcium ( $Ca^{2+}$ ) profile in spine and PSD in all simulations. Basal  $Ca^{2+}$  level is 80 nM with fluctuations every 2 s, lasting for 2 s. These fluctuations are sampled from a uniform distribution with mean  $\mu = 120$  nM and standard deviation of  $\sigma = 23$  nM. **(D)** Without diffusion and subunit exchange, CaMKII in our model is bistable. Two trajectories of CaMKII activity (fraction of total CaMKII holoenzymes with at least 2 subunits phosphorylated) are shown for different system size  $N_{CaMKII}=15$  (top) and  $N_{CaMKII}=35$  (bottom). **(D)** Switch stability increases exponentially with system size  $N_{CaMKII}$ . The average residence time of switch's stable states increases exponentially with number of CaMKII holoenzymes ( $N_{CaMKII}$ ). Turnover rate  $v_t=30 \text{ h}^{-1}$ . Panels **(C, D, E)** show key properties of our model that are very similar to those of the MZ model.

**Subunit exchange increases the tolerance of the CaMKII switch to PP1 and to protein turnover.** We first analysed switch sensitivity to PP1. In our model as well in the MZ model, the number of PP1 molecules ( $N_{PP1}$ ) had an upper limit for the switch to exhibit bistability. This constraint arises because PP1 must saturate in the ON state of the switch, i.e., the maximal enzymatic turnover of PP1 must be smaller than the rate of activation of CaMKII subunits. However, unlike the MZ model where the addition of one extra PP1 molecule changed the spontaneous state switching time (residence time) of ON state by roughly 90% (Fig. 2C in (18)), we did not find lifetime of ON and OFF states to be very sensitive to PP1. In our model, it required on average  $0.5 \times N_{CaMKII}$  extra PP1 molecules to cause a 90% change in the residence time. The additional number of PP1 required for switching is roughly equal to number of CaMKII subunits in our model.

We found that the system consisting of  $N_{CaMKII}$  holoenzymes remained bistable for  $N_{PP1}=8 \times$  to  $15 \times N_{CaMKII}$  without subunit exchange, and for  $N_{PP1}=12 \times$  to  $21 \times N_{CaMKII}$  with subunit exchange. Thus subunit exchange shifted the bistable range to higher values of PP1. Nevertheless, the ratio range in both cases was about the same (blue and red sigmoidal fit in Fig. 2B).

Subunit exchange also had a strong effect on time spent by the switch in transition from one stable state to another (relaxation time). When subunit exchange was enabled, the relaxation time was reduced (red v/s blue dotted line in Fig. 2B) and also became independent of  $N_{PP1}$ . Moreover, the standard deviation of the relaxation time was greatly reduced in the presence of subunit exchange (red and blue curve, Fig. 2C).

Parallel results were obtained for the effect of subunit exchange on CaMKII switch robustness in the context of protein turnover. Without subunit exchange, switch stability as measured by residence time of the ON state decreased exponentially with increasing turnover rate. With subunit exchange, however, residence time of ON state remained roughly constant upto a  $\sim 10$  fold increase in turnover (Fig. 3B), after which subunit exchange could not

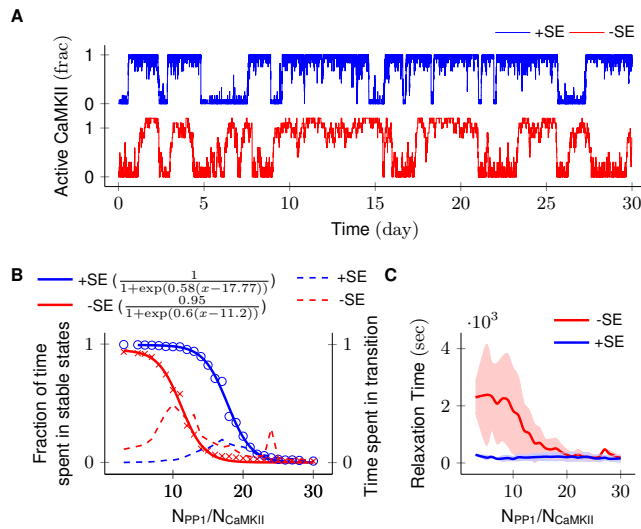

**Fig. 2.** Subunit exchange improves switch tolerance of PP1. **(A)** Two representative trajectories ( $N_{\text{CaMKII}}=10$ ) are shown with subunit exchange (+SE, blue) and without subunit exchange (-SE, red) respectively. **(B)** Blue and red solid-lines represent average activity of switch with and without subunit exchange respectively. The lines are fitted with the function  $\frac{a}{1+e^{k(x-x_0)}}$ . Dotted red and blue lines show the fraction of time that the switch spends in intermediate states ( $x_a y_{n-a}$ ,  $1 < a < n-1$ ) with and without subunit exchange respectively. Due to subunit exchange, the switch tolerated a larger amount of PP1 ( $x_0$  value 11.2 vs 17.77 i.e., a change of  $6.57 \times N_{\text{CaMKII}}$ ). Note that the range of PP1 for which switch remains bistable is roughly the same ( $k$ , 0.6 v/s 0.58). The fraction of time in intermediate states (dotted lines) is much smaller in the case of subunit exchange (blue dotted line), i.e. the switching time is shorter. **(C)** Due to subunit exchange, relaxation time becomes constant and independent of  $N_{\text{PP1}}$  (blue vs red). Shaded area represents standard deviation.

phosphorylate all inactive holoenzymes produced by turnover, and the switch started to show exponential decay of stability. As expected, turnover increased the number of switching events in the regime of bistability in both cases. 81

Thus subunit exchange increases the range of  $N_{\text{PP1}}$  and turnover rate over which the switch remains bistable. 82

**Subunit exchange facilitates the spread of CaMKII activity.** As suggested in (27), we found that subunit exchange facilitates spread of CaMKII activation (Fig. 4). When subunits were allowed to diffuse, they could be picked by neighbouring inactive CaMKII holoenzymes. This effectively overcame the first slow step of CaMKII phosphorylation (Eq. (1)) thereby facilitating the spread of activation. 84

We put  $N_{\text{CaMKII}}=18$  inactive holoenzymes in a cylinder with the volume of  $0.0275 \mu\text{m}^3$  and the length of 540 nm representing the PSD. The cylinder was divided into 18 voxels (1 holoenzyme in each voxel). Each voxel was separated by 30 nm, which is the average nearest neighbour distance for CaMKII holoenzymes (31). Each voxel was considered to be a *well-mixed* environment i.e. diffusion was instantaneous within the voxel. Diffusion was implemented as cross-voxel “jump” reactions (See Materials and Methods). We did not try 2D/3D diffusion because of its simulation complexity and because it would be expected to be qualitatively similar (32). 85

We fixed the diffusion coefficient of PP1 ( $D_{\text{PP1}}$ ) and quantified the effect of varying the diffusion coefficient of subunits ( $D_{\text{sub}}$ ) and basal calcium levels. We used  $D_{\text{PP1}}=0.5 \mu\text{m}^2 \text{s}^{-1}$  which is the observed value of the diffusion coefficient of Ras, which is a similar sized protein (33). We ran simulations for 4 hours at basal calcium concentration  $[\text{Ca}^{2+}]=80 \text{nM}$  and without subunit exchange (i.e.  $D_{\text{sub}}=0$ ). Here the system showed no significant CaMKII activity. When we enabled subunit exchange by setting  $D_{\text{sub}}=0.1 \mu\text{m}^2 \text{s}^{-1}$ , Fig. 4B), CaMKII activity rose to maximum within 4 h. As expected, the effect of subunit exchange (rise time quantified as the time taken by CaMKII to rise from 10% to 90%) was stronger when the basal  $\text{Ca}^{2+}$  was higher (Fig. 4C). Increasing  $D_{\text{sub}}$  decreased the rise time of CaMKII activity. 86

Subunit exchange did not have any impact on the average CaMKII activity at longer time scales (Fig. 4E) though we found that long-time average CaMKII activity increased when subunit exchange was enabled. This change was independent of  $D_{\text{sub}}$  (not due to subunit exchange) but was strongly dependent on  $D_{\text{PP1}}$ . This is due to the fact that potency of PP1 reduced with increased  $D_{\text{PP1}}$  (Fig. S2) which led to decreased PP1 activity and hence CaMKII activity. 87

Thus subunit exchange facilitates the spread of kinase activity at short time scale but does not influence its long time activity. 88

**Subunit exchange synchronizes switching activity of clustered CaMKII.** Next we probed the effect of subunit exchange between spatially separated CaMKII clusters at longer timescales. We considered  $N_{\text{CaMKII}}$  organized into 89

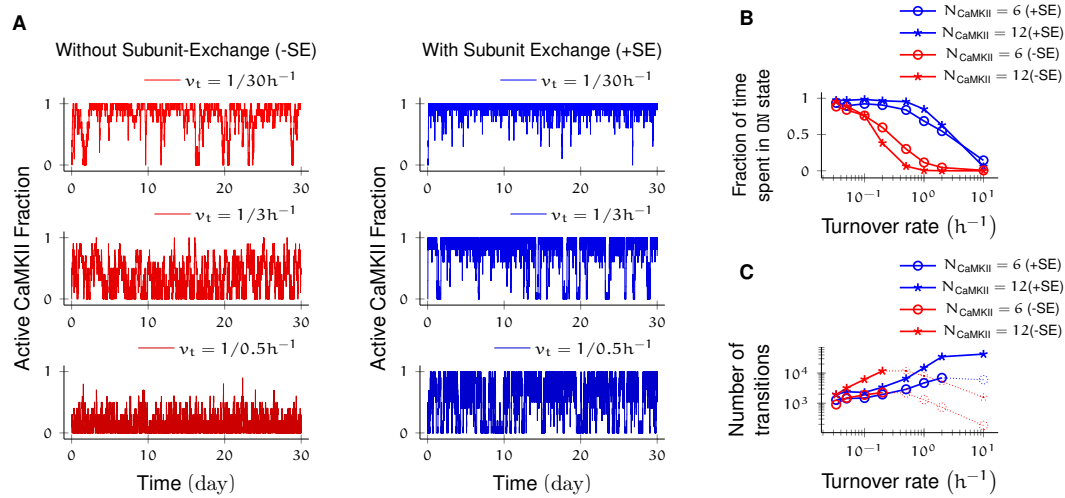

**Fig. 3.** Subunit exchange improves switch tolerance of higher rates of protein turnover. **(A)** Three sample trajectories are shown for a switch of size  $N_{\text{CaMKII}}=10$  with subunit exchange (+SE, blue) and without it (-SE, red). We consider three different turnover rates of 1 per 30 h, 1 per 3 h, and 1 per 0.5 h. As turnover is increased, the state stability of the ON state of the switch decreases. **(B)** Normalized residence time of ON state vs. turnover rate for two switches of size 6 and 12. Without subunit exchange, switch stability decreases exponentially with turnover rate (red), however when subunit exchange is enabled, switch stability is not affected by turnover rates as high as  $1 \text{ h}^{-1}$  (blue). **(C)** In the bistable regime (solid lines), the number of switching events increases roughly linearly with turnover rate.

three clusters of  $N_{\text{CaMKII}}/3$  holoenzymes, each separated by a distance  $d$ . This configuration corresponds to cases where receptors and CaMKII holoenzymes are clustered at the synapse.

When there is no subunit exchange across voxels i.e.  $D_{\text{sub}}=0$ , these switches are expected to switch independently like multiple coins flipped together, resulting in a binomial distribution of activity. The clustered system had 3 relatively stable bistable systems (long residence time, Fig. 1E). As expected, without subunit exchange, activity in this system had a binomial distribution (Fig. 5B, red plot).

Then we allowed PP1 and CaMKII subunits to undergo linear diffusion. We fixed  $D_{\text{PP1}}=0.5 \mu\text{m}^2 \text{s}^{-1}$  as before and varied  $D_{\text{sub}}$  to quantify effect of subunit exchange. Subunit exchange led to synchronization of switching activity. The population of clustered CaMKII acted as a single bistable switch (Fig. 5B, blue plot). This effect was strong and robust to variation in  $D_{\text{sub}}$ . Even for a very small value of  $D_{\text{sub}}=0.01 \mu\text{m}^2 \text{s}^{-1}$ , we observed strong synchronization (Fig. 5D). The synchronization disappeared completely for diffusion coefficient less than  $D_{\text{sub}}=10^{-4} \mu\text{m}^2 \text{s}^{-1}$  for distance  $d > 30 \text{ nm}$  (Fig. 5D).

Thus for most physiologically plausible values of diffusion coefficient  $D_{\text{sub}}$ , subunit exchange causes synchronization of switching activity of clustered CaMKII.

**Subunit exchange may account for the observed dual decay rate of CaMKII phosphorylation.** Finally, we asked if subunit exchange might account for the complex time-course of CaMKII dynamics in spine as observed in recent experiments (8). We designed an experiment to replicate an experiment where CaMKII was inhibited by a genetically encoded photoactivable inhibitory peptide after activating it by glutamate uncaging (34). In the spine, CaMKII is more accessible to phosphatases than in the PSD, where our previous calculations had been located. To model the increased availability of phosphatases, we increased the number of PP1 by an order of magnitude, and increased the volume of the compartment to match the volume of a typical spine head i.e.  $0.02 \mu\text{m}^3$  (14). We found that CaMKII acted as an integrator of calcium activity with typical exponential decay dynamics (Fig. 6A). We then enabled the diffusion of CaMKII subunits and PP1 with same diffusion coefficient  $D_{\text{sub}}=D_{\text{PP1}}=1 \mu\text{m}^2 \text{s}^{-1}$ . These conditions decreased the rate of dephosphorylation of CaMKII holoenzymes significantly. The decay dynamics could not be fitted using a simple exponential (Fig. 6B). With our values of parameters, decay rate decreased by an order of



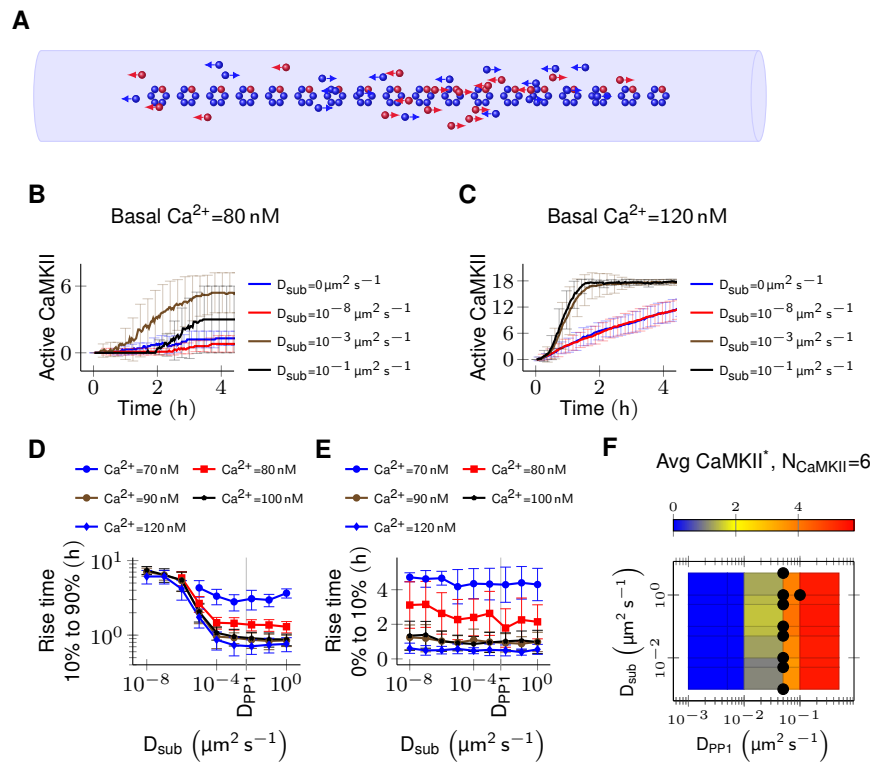

**Fig. 4.** Subunit exchange facilitates the spread of kinase activity (27) but does not change its long-time average. **(A)** 18 CaMKII holoenzymes were put in a cylinder of volume  $0.0275 \mu\text{m}^3$  discretized into 18 voxels, each separated by 30 nm. For all simulations  $D_{\text{PP1}} = 0.5 \mu\text{m}^2 \text{s}^{-1}$ . **(B)** Activation profile of CaMKII at mean basal calcium level of 80 nM (Fig. 1C) for different values of  $D_{\text{sub}}$ . When subunits diffused with zero or negligible coefficient ( $D_{\text{sub}}=0$  and  $D_{\text{sub}}=10^{-8} \mu\text{m}^2 \text{s}^{-1}$ ), mean activity of CaMKII remained roughly zero. For  $D_{\text{sub}}=0.001$  and  $0.1 \mu\text{m}^2 \text{s}^{-1}$ , the mean CaMKII activity reached its maximum within 4 h. **(C)** CaMKII activates faster at higher mean basal calcium level of 100 nM. **(D)** The time taken by CaMKII to rise from 10% to 90% of its maximum value (rise time) in hours v/s  $D_{\text{sub}}$  for different mean basal calcium levels. The effect of subunit exchange is more prominent at higher calcium levels for all values of  $D_{\text{sub}}$ , and stronger (decreasing rise time) for larger  $D_{\text{sub}}$  for all values of  $\text{Ca}^{2+}$  level. 40 trajectories were generated for each trace (Also see Fig. S3). Error bars represent standard deviation. **(E)** The onset of activity time (in hours) v/s  $D_{\text{sub}}$ , where onset of activity time is measured as the time taken by inactive CaMKII to rise from zero to 10% of its maximum value. Average onset of activity time decreased with increasing basal  $\text{Ca}^{2+}$  level but remained independent of  $D_{\text{sub}}$ . Error bar represents standard deviation. **(F)** Long-time average CaMKII activity ( $N_{\text{CaMKII}}=6$ ) is independent of  $D_{\text{sub}}$ , and only depends on  $D_{\text{PP1}}$ . Black dots represent bistable configurations with at least 4 transitions observed in 10 days long simulation.

magnitude when subunit exchange was enabled (Fig. 6B).

We expected subunit exchange to have a strong effect on the decay activity of clustered CaMKII in spine cytosol (e.g. CaMKII bound to actin) because of the close proximity of holoenzymes, leading to rapid exchange. Our simulations supported this prediction. If there are populations of clustered as well as non-clustered CaMKII in the spine, we expect that they will exhibit long and short time-courses of activity decay.

Thus we suggest that subunit exchange may be a mechanism that leads to CaMKII $\alpha$  activity decaying with two time-courses in spine cytosol (8).

## Discussion

Here we have shown that subunit exchange strongly affects the properties of CaMKII/PP1 pathway, both in its role as a bistable switch in PSD and as an integrator of calcium activity in spine cytosol. In the PSD, where the model was tuned to elicit bistable dynamics from clustered CaMKII, subunit exchange improved the stability of CaMKII/PP1 switch by synchronizing the kinase activity across PSD (Fig. 6). It also improved CaMKII tolerance of PP1 and turnover rate (Fig. 2 and Fig. 3). In the case where CaMKII was uniformly distributed in PSD, subunit exchange facilitated more rapid activation of CaMKII (Fig. 4BCD) (27). These simulation results predict that a CaMKII mutant

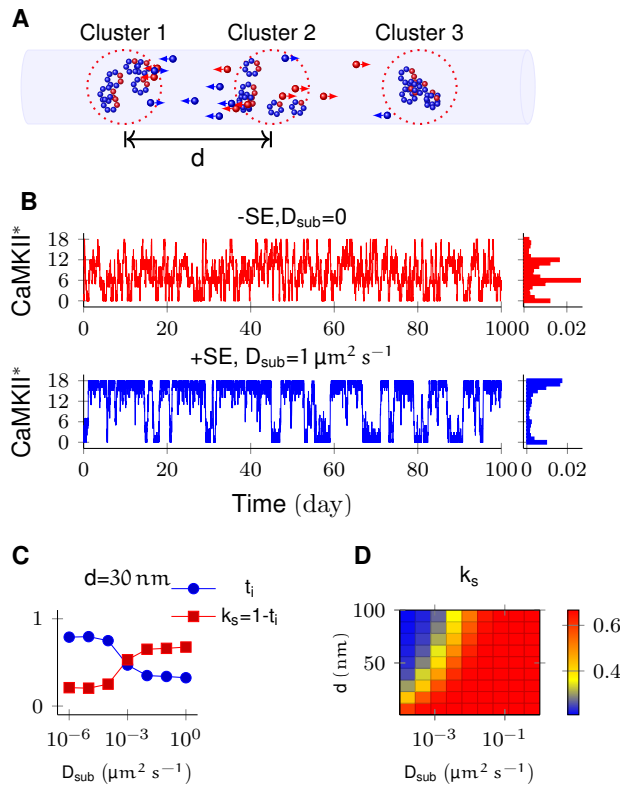

**Fig. 5.** In PSD, subunit exchange synchronizes activity of CaMKII clusters. **(A)** 3 clusters of  $N_{\text{CaMKII}}=6$  in PSD separated by distance  $d$ . CaMKII subunits are shown as red (inactive) and blue (active) balls. Subunits and PP1 (not shown) were allowed to diffuse along the axis. **(B)** Without subunit exchange, all three switches flipped independently i.e. state distribution on right is binomial when bin size is  $N_{\text{CaMKII}}$  (red). With subunit exchange, all switches synchronized their activity i.e. population acted as a single bistable switch (blue). **(C)** Strength of synchronization ( $k_s$ ) v/s diffusion coefficient  $D_{sub}$  for a system of 3 switches separated from each other by a distance 30 nm.  $k_s = 1 - t_i$  where  $t_i$  is fraction of time spent by switches in intermediate states  $x_a y_{n-a}$ ;  $1 < a < n$ . Synchronization is strong for  $k_s > 0.4$ . **(D)** Phase plot of  $k_s$  v/s  $D_{sub}$  and  $d$ . The effect of synchronization  $k_s$  due to subunit exchange is strong and robust to changes in  $D_{sub}$ , and strong for  $d$  as large as 100 nm.  $D_{PP1}=0.5 \mu\text{m}^2 \text{s}^{-1}$  for all simulations.

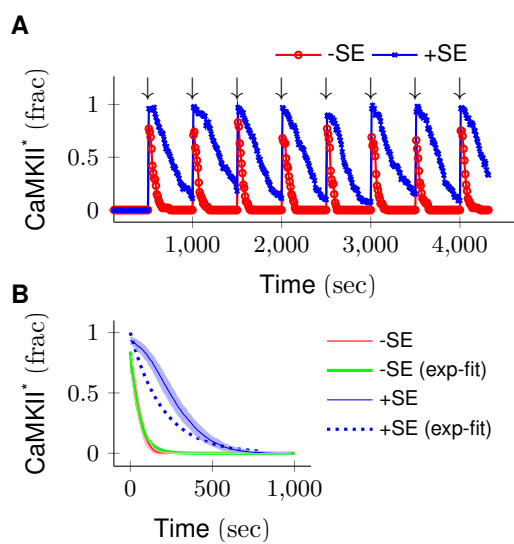

**Fig. 6.** CaMKII acts as an integrator of calcium activity in spine cytosol. Due to subunit exchange, CaMKII decayed with much larger time-constant and almost linearly. **(A)** Trajectories of CaMKII activity (fraction of total CaMKII) are shown in red (without subunit exchange) and blue (with subunit exchange). Every 500 s, a 3 s long strong calcium pulse is applied to the system ( $\downarrow$ ) thereby activating CaMKII. After the pulse, calcium levels were brought down to basal level. **(B)** Average decay dynamics for 500 s after the onset of strong calcium pulse ( $\downarrow$ ). Solid red line shows decay dynamics when there is no subunit exchange; CaMKII decays at timescale of approximately 50 s. Solid blue line shows the case when subunit exchange is enabled, CaMKII decay has larger time-constant of  $\sim 300$  s. Dotted blue line shows exponential fit of slow time-course which does not fit well. On the other hand, the fast trajectory fits very well by an exponential (red, -SE (exp-fit)). Shaded areas are the standard deviation. Though the absolute value of fast and slow timescales are much higher, the ratio of fast and slow time-courses matches well with experimental data (8).

lacking subunit exchange would be deficient in the switch stability and slower to activate. 149

In the spine head, subunit exchange facilitated integration by prolonging the decay time-course of kinase activity 150 (Fig. 6). The fact that CaMKII dynamics changed from an integrator to bistable switch as we moved from spine 151 cytosol (a phosphatase rich environment) to the PSD (where PP1 is tightly controlled) suggests an interesting 152 sub-compartmentalization of functions in these microdomains. Furthermore, we observed that the clustering of 153 CaMKII had important implications for its sustained activity. 154

CaMKII is non uniformly distributed in PSD. Most of it is concentrated in a small region of 16 nm to 36 nm 155 below synaptic cleft (22) where it may exist in large clusters given that CaMKII has multiple binding partners in 156 the PSD. Our study predicts that subunit exchange may lead to synchronization when CaMKII is clustered, or 157 more rapid activation by calcium when it is uniformly distributed. Given that CaMKII can form clusters with 158 N-methyl-D-aspartate (NMDA) receptors, it would be interesting to study the mixed case where some CaMKII is 159 clustered and rest is uniformly distributed. This would require detailed 3D simulation and is beyond the scope of 160 this study. 161

Subunit exchange is unlikely to have any impact on neighbouring spines. The mean escape time of a single CaMKII 162 subunit from a typical spine is between 8 s to 33 s (35). In a real synapse, this time would be even larger given that 163 CaMKII interacts with many other molecules. Any phosphorylated subunit is almost certain to be de-phosphorylated 164 by PP1 during this time. We therefore predict that the effects of synchronization are local to each PSD, where PP1 165 is known to be tightly controlled. Subunit exchange loses its potency in the phosphatase rich region of the bulk 166 spine head or dendrite. We therefore consider it unlikely that CaMKII subunit exchange plays any role in intra-spine 167 information exchange such as synaptic tagging. 168

Finally, we suggest that existence of diverse time-scales of CaMKII activity in the PSD and spine head has important 169 theoretical implications. A very plastic synapse is good at registering activity dependent changes (learning) but bad 170 at retaining old memories. On the other hand, a rigid synapse is good at retaining old memories but is not efficient for 171 learning. A theoretical meta-model which sought to strike a balance between these two competing demands requires 172 that diversity of timescales should exist at the synapse (36). In this model, complex synapses with state variables 173 with diverse time-scales are shown to form a memory network in which storage capacity scales linearly with number 174 of synapses, and memory decay follows  $1/\sqrt{t}$  — a power-law supported by psychological studies (37). This model 175 requires memory trace to be first stored in a fast variable and then progressively and efficiently transferred to slower 176 variables. Our study suggests a concrete mechanism for such a process. Here, calcium concentration in PSD can 177 be mapped to the fastest variable. The CaMKII integrator in cytosol could represent the second slower variable to 178 which the trace is transferred from calcium. Further, the state information is transferred to the third slower CaMKII 179 bistable switch. The dynamics of CaMKII in the PSD forms an even slower bistable variable for longer retention of 180 the memory trace. It is possible that memory is transferred from here to even slower variables, such as sustained 181 receptor insertion (11), PKM- $\zeta$  activation (12), or local protein synthesis (9). 182

## Materials and Methods 183

The kinase CaMKII has a rich history of modeling spanning over two decades with varying complexity (16). We based our study 184 on the work of Miller and Zhabotinsky (MZ model) (18). We extended their model to incorporate *subunit exchange* and diffusion. 185 We treat the CaMKII ring as proxy for the holoenzyme because vertical dimers (one subunit from the top ring and one from 186 the ring below) are inserted or released together (38) and we assumed that the top and the bottom subunits of a vertical dimer 187 phosphorylate and de-phosphorylate together. 188

In our model, a CaMKII ring with  $n$  subunits ( $n=6$  or  $7$ ) can exist in  $n$  different states  $x_a y_{n-a}$  where  $a$  is the number of 189 un-phosphorylated subunits (represented by  $x$ ), and  $n - a$  is the number of phosphorylated subunits (represented by  $y$ ). All 190 CaMKII rings in our model have either 6 or 7 subunits. The number of CaMKII states in our model increased from 2 (ACTIVE and 191 INACTIVE) in MZ model to 13. We ignore all rotational permutations and kinetically unlikely cases where there are discontinuous 192



phosphorylated subunits in the ring. We assumed that the phosphorylation of neighbouring subunit proceeds clockwise. 193

**Phosphorylation and dephosphorylation of CaMKII ring.** The activation of CaMKII follows the same dynamics as in MZ model. 194  
Upon its influx into spine,  $\text{Ca}^{2+}$  binds to calmodulin (CaM) to form calcium/calmodulin complex ( $\text{Ca}^{2+}/\text{CaM}$ ). The first step in 195  
CaMKII activation requires simultaneous binding of two  $\text{Ca}^{2+}/\text{CaM}$  to the two adjacent subunits of CaMKII. The probability 196  
of such simultaneous binding of two  $\text{Ca}^{2+}/\text{CaM}$  is very low at basal  $\text{Ca}^{2+}$  concentration. Once a subunit is phosphorylated, it 197  
catalyzes phosphorylation of its neighbour (*auto-phosphorylation*). Auto-phosphorylation requires binding of only one  $\text{Ca}^{2+}/\text{CaM}$  198  
therefore proceeds at much faster rate compared to the first step. Once fully phosphorylated, CaMKII moves to PSD where it 199  
binds to NMDA receptor. Upon binding, it is no longer accessible other phosphatases save PP1. 200

Following Zhabotinsky, we also assumed that  $\text{Ca}^{2+}/\text{CaM}$  binding to CaMKII ring is independent of the current state of the 201  
ring. The activation of a subunit by  $\text{Ca}^{2+}$  follows a Hill equation (Eq. (1)) (17). 202

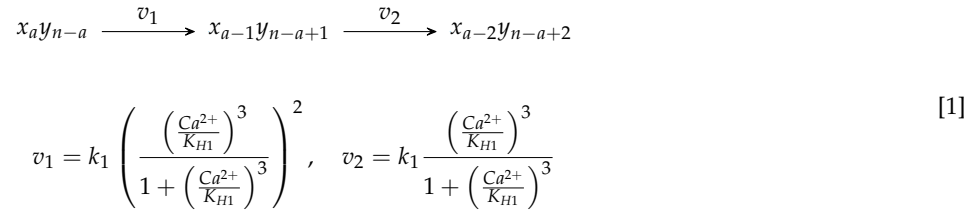

where  $n = 6$  or  $7$ , and  $1 \leq a \leq n$ . 204

The dephosphorylation of the CaMKII ring and the single subunit follow a Michaelis-Menten like scheme. But rather than 205  
using the Michaelis-Menten approximation, we implemented this as coupled mass-action chemical reactions as shown by Eq. (2). 206

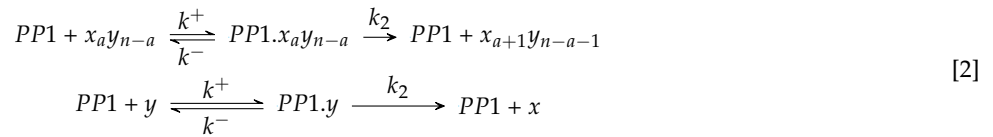

where  $n = 6$  or  $7$ , and  $1 \leq a \leq n$ . 208

Following Miller et al. (18), we assumed  $k^- = 0$ . This gave us  $k^+ = \frac{k_2}{k_M} = 1 / \mu\text{M/s}$ . 209

**Subunit exchange.** In our model, a CaMKII ring is made up of either 6 or 7 subunits. Therefore CaMKII ring with 6 subunits 210  
cannot lose a subunit while a CaMKII ring with 7 subunits cannot gain a subunit. The gained or lost subunit can be either 211  
phosphorylated ( $x$ ) or un-phosphorylated ( $y$ ). All possible reactions which result in either gain or lose of a subunit are given by 212  
Eq. (3). 213

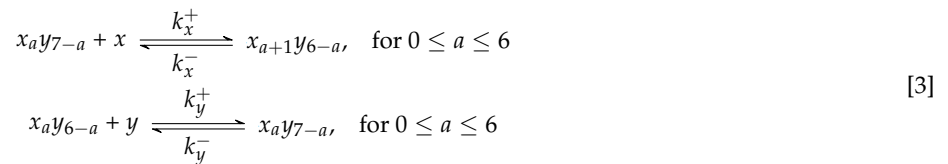

The values of  $k_x^+$ ,  $k_x^-$ ,  $k_y^+$ , and  $k_y^-$  are not available in the literature that we are aware of. We assumed that these reactions operate 215  
at the timescale of second. Bhattacharya et. al. (38) speculate that upon activation, the hub of holoenzyme becomes less stable and 216  
more likely to open up and lose a subunit. Therefore we assumed the rate of losing subunit ( $k_y^-, k_x^-$ ) to be larger than the rate of 217  
gaining a subunit ( $k_y^+, k_x^+$ ). In all simulations, we maintained the following ratio  $k_x^- = 10k_x^+ N_{\text{CaMKII}}$  and  $k_y^- = 10k_y^+ N_{\text{CaMKII}}$ . 218

**PP1 deactivation.** In the PSD, PP1 is the primary – and perhaps only – phosphatase known to dephosphorylate CaMKII (39). In the 219  
PSD, PP1 is inhibited by phosphorylated inhibitor-1 (I1P) and a dopamine- and cyclic-AMP regulated neuronal phosphoprotein 220  
(DARPP-32) (an isomer of inhibitor-1 (I1)) (40, 41) (also see (42)). 221

I1 is phosphorylated by protein kinase A (PKA) and dephosphorylated by calcineurin (CaN). We followed Zhabotinsky's 222  
assumption that I1 level are constant in the PSD because I1 exchanges rapidly with spine cytosol (17). We assumed the concentra- 223  
tion of I1 to be the same in both PSD and spine cytosol. We followed Miller and Zhabotinsky in making the approximation that I1 224  
phosphorylation is very fast compared to the phosphorylation of CaMKII. Therefore, under the *quasi-equilibrium* approximation, 225

I1P level are given by Eq. (4) where  $v_{PKA}$  is the activity of PKA divided by its Michaelis constant, and  $v_{CaN}$  is the activity of CaN divided by its Michaelis constant (18). 226  
227

$$I1P = I1 \frac{v_{PKA}}{v_{CaN}} \frac{1 + \left(\frac{Ca}{k_{H2}}\right)^3}{\left(\frac{Ca}{k_{H2}}\right)^3} \quad [4] \quad 228$$

I1P renders PP1 inactive by forming I1P-PP1 complex (I1P.PP1). This reaction (5) is also assumed to be fast (18). 229

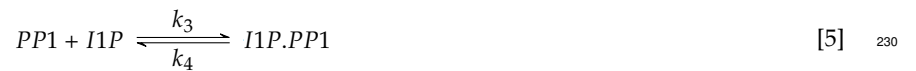

**Turnover.** The turnover of CaMKII is a continuous process with rate  $v_t s^{-1}$ . We modeled turnover by replacing a CaMKII ring with  $a > 1$  phosphorylated subunits by an inactive CaMKII ring of the same symmetry. 231  
232

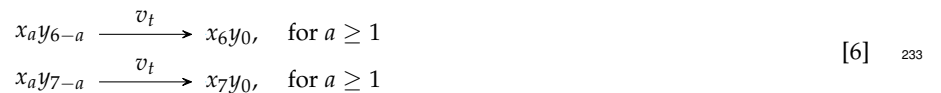

**Diffusion and simulation method.** Diffusion is implemented as cross voxel “jump” reaction. Diffusion of a species  $X$  with diffusion-coefficient  $D_X$  between voxel A and B separated by distance  $h$  is modelled by reaction  $X_A \xrightleftharpoons[k]{k^+} X_B$  where  $k = D_X/h^2$ , and  $[X_A] = [X_B] = [X]/2$  (43). Lowering  $h$  improves the accuracy of diffusive component of system but bimolecular reactions are increasingly lost as  $h$  gets smaller and smaller (44). We have many bimolecular reactions with diffusing species (PP1 and subunits) as reactants. For all of our simulations,  $h$  is 30 nm – mean nearest-neighbour distance for CaMKII. We computed the critical value of  $h$  namely  $h_{crit}$  for which error is in acceptable bound i.e.  $< 1\%$ . The value of  $h_{crit}$  is determined by the fastest bimolecular reaction (Eq. (2)) and the slowest diffusion coefficient. The lower bound on  $h$  i.e.  $h_{crit} \gg \frac{k^+}{D_{PP1} + D_{sub}}$  where  $k$  is the reaction rate (44). Based on our own numerical results (see SI) and other studies (44, 45), we are confident that  $h \geq 10h_{crit} = \frac{k^+}{D_{PP1} + D_{sub}}$  is a good value (45). We have  $h_{crit} \leq 3.2$  nm whenever  $D_{PP1} + D_{sub} \geq 0.5 \mu m^2 s^{-1}$ . For all simulations presented in main text, we maintain  $h \geq h_{crit}$ . For a case where  $h$  is smaller than  $h_{crit}$  in some trajectories see Fig. S2. 234  
235  
236  
237  
238  
239  
240  
241  
242  
243

All simulations were performed using Stochastic solver (Gillespie method) available in MOOSE simulator (<https://moose.ncbs.res.in>, version 3.1.2) (46). 244  
245

**Table of parameters.** Table 1 summaries parameters of our model. 246

**ACKNOWLEDGMENTS.** We’d like to thank Marcus Benna, Stefano Fusi and Moitrayee Bhattacharyya for discussions related to their work, Mukund Thattai for useful discussions on the stochastic reaction diffusion methods, and Bhanu Priya for useful comments on the manuscript. This work was funded by NCBS/TIFR and SERB JC Bose fellowship SB/S2/JCB-023/2016 to USB. 247  
248  
249

## References 250

1. Hebb DO (2005) *The Organization of Behavior: A Neuropsychological Theory*. (Psychology Press). Google-Books-ID: uyV5AgAAQBAJ. 251
2. Takeuchi T, Duzsikiewicz AJ, Morris RGM (2014) The synaptic plasticity and memory hypothesis: encoding, storage and persistence. *Phil. Trans. R. Soc. B* 369(1633):20130288. 00078. 252  
253
3. Choi JH, et al. (2018) Interregional synaptic maps among engram cells underlie memory formation. *Science* 360(6387):430–435. 00000. 254
4. Bliss TV, Collingridge GL (2013) Expression of NMDA receptor-dependent LTP in the hippocampus: bridging the divide. *Molecular Brain* 6:5. 255
5. Mayford M, Siegelbaum SA, Kandel ER (2012) Synapses and Memory Storage. *Cold Spring Harbor Perspectives in Biology* 4(6):a005751. 00134. 256
6. Lucchesi W, Mizuno K, Giese KP (2011) Novel insights into CaMKII function and regulation during memory formation. *Brain Research Bulletin* 85(1-2):2–8. 00076. 257  
258
7. Giese KP, Fedorov NB, Filipkowski RK, Silva AJ (1998) Autophosphorylation at Thr286 of the  $\alpha$  Calcium-Calmodulin Kinase II in LTP and Learning. *Science* 279(5352):870–873. 259  
260
8. Chang JY, et al. (2017) CaMKII Autophosphorylation Is Necessary for Optimal Integration of Ca(2+) Signals during LTP Induction, but Not Maintenance. *Neuron* 94(4):800–808.e4. 00001. 261  
262

9. Aslam N, Kubota Y, Wells D, Shouval HZ (2009) Translational switch for long-term maintenance of synaptic plasticity. *Molecular Systems Biology* 5(1):284. 00039. 263
10. Shouval HZ (2005) Clusters of interacting receptors can stabilize synaptic efficacies. *Proceedings of the National Academy of Sciences* 102(40):14440–14445. 00053. 264
11. Hayer A, Bhalla US (2005) Molecular switches at the synapse emerge from receptor and kinase traffic. *PLoS computational biology* 1(2):137–154. 265
12. Sacktor TC (2012) Memory maintenance by PKM $\zeta$  — an evolutionary perspective. *Molecular Brain* 5:31. 00085. 266
13. Rossetti T, et al. (2017) Memory Erasure Experiments Indicate a Critical Role of CaMKII in Memory Storage. *Neuron* 96(1):207–216.e2. 267
14. Bartol TM, et al. (2015) Nanoconnectomic upper bound on the variability of synaptic plasticity. *eLife* 4. 268
15. Lisman JE (1985) A mechanism for memory storage insensitive to molecular turnover: a bistable autophosphorylating kinase. *Proceedings of the National Academy of Sciences of the United States of America* 82(9):3055–3057. 269
16. Sandstorm M (2004) Master's thesis (KTH, Royal Institute of Technology, Stockholm, Sweden). 00000 Malin Sandstrom TRITA-NA-E04014 Thesis in Biomedical Engineering (20 credits) at the School of Engineering Physics, Royal Institute of Technology year 2004 Supervisor at Nada was Jeanette Hellgren-Kotaleski Examiner was Anders Lansner. 270
17. Zhabotinsky AM (2000) Bistability in the Ca $^{2+}$ /Calmodulin-Dependent Protein Kinase-Phosphatase System. *Biophysical Journal* 79(5):2211–2221. 00000. 271
18. Miller P, Zhabotinsky AM, Lisman JE, Wang XJ (2005) The Stability of a Stochastic CaMKII Switch: Dependence on the Number of Enzyme Molecules and Protein Turnover. *PLoS Biology* 3(4):e107. 00141. 272
19. Bradshaw JM, Kubota Y, Meyer T, Schulman H (2003) An ultrasensitive Ca $^{2+}$ /calmodulin-dependent protein kinase II-protein phosphatase 1 switch facilitates specificity in postsynaptic calcium signaling. *Proceedings of the National Academy of Sciences of the United States of America* 100(18):10512–10517. 00139. 273
20. Urakubo H, Sato M, Ishii S, Kuroda S (2014) In vitro reconstitution of a CaMKII memory switch by an NMDA receptor-derived peptide. *Biophysical Journal* 106(6):1414–1420. 274
21. Dosemeci A, Weinberg RJ, Reese TS, Tao-Cheng JH (2016) The Postsynaptic Density: There Is More than Meets the Eye. *Frontiers in Synaptic Neuroscience* 8. 00011. 275
22. Petersen JD, et al. (2003) Distribution of Postsynaptic Density (PSD)-95 and Ca $^{2+}$ /Calmodulin-Dependent Protein Kinase II at the PSD. *Journal of Neuroscience* 23(35):11270–11278. 276
23. Koch C (2004) *Biophysics of Computation: Information Processing in Single Neurons (Computational Neuroscience Series)*. (Oxford University Press, Inc., New York, NY, USA). 277
24. Strack S, Barban MA, Wadzinski BE, Colbran RJ (1997) Differential inactivation of postsynaptic density-associated and soluble Ca $^{2+}$ /calmodulin-dependent protein kinase II by protein phosphatases 1 and 2a. *Journal of Neurochemistry* 68(5):2119–2128. 278
25. Bollen M, Peti W, Ragusa MJ, Beullens M (2010) The extended PP1 toolkit: designed to create specificity. *Trends in Biochemical Sciences* 35(8):450–458. 279
26. Lisman J (1994) The CaM kinase II hypothesis for the storage of synaptic memory. *Trends in Neurosciences* 17(10):406–412. 280
27. Stratton M, et al. (2014) Activation-triggered subunit exchange between CaMKII holoenzymes facilitates the spread of kinase activity. *eLife* 3:e01610. 00013. 281
28. Woodgett JR, Davison MT, Cohen P (year?) The calmodulin-dependent glycogen synthase kinase from rabbit skeletal muscle. *European Journal of Biochemistry* 136(3):481–487. 00132. 282
29. Hoelz A, Nairn AC, Kuriyan J (2003) Crystal Structure of a Tetradecameric Assembly of the Association Domain of Ca $^{2+}$ /Calmodulin-Dependent Kinase II. *Molecular Cell* 11(5):1241–1251. 00000. 283
30. Novère NL, et al. (2009) The Systems Biology Graphical Notation. *Nature Biotechnology* 27(8):735–741. 00000. 284
31. Feng B, Raghavachari S, Lisman J (2011) Quantitative estimates of the cytoplasmic, PSD, and NMDAR-bound pools of CaMKII in dendritic spines. *Brain Research* 1419:46–52. 00025. 285
32. Fange D, Berg OG, Sjöberg P, Elf J (2010) Stochastic reaction-diffusion kinetics in the microscopic limit. *Proceedings of the National Academy of Sciences*. 286
33. Harvey CD, Yasuda R, Zhong H, Svoboda K (2008) The Spread of Ras Activity Triggered by Activation of a Single Dendritic Spine. *Science* 287

- 321(5885):136–140. 00305. 308
34. Murakoshi H, et al. (2017) Kinetics of Endogenous CaMKII Required for Synaptic Plasticity Revealed by Optogenetic Kinase Inhibitor. *Neuron* 94(1):37–47.e5. 00004. 309  
310
35. Holcman D, Schuss Z (2011) Diffusion laws in dendritic spines. *The Journal of Mathematical Neuroscience* 1(1):10. 00039. 311
36. Benna MK, Fusi S (2016) Computational principles of synaptic memory consolidation. *Nature Neuroscience* 19(12):1697–1706. 00001. 312
37. Wixted JT, Ebbesen EB (1991) On the Form of Forgetting. *Psychological Science* 2(6):409–415. 00473. 313
38. Bhattacharyya M, et al. (2016) Molecular mechanism of activation-triggered subunit exchange in Ca(2+)/calmodulin-dependent protein kinase II. *eLife* 5. 00000. 314  
315
39. Strack S, Choi S, Lovinger DM, Colbran RJ (1997) Translocation of autophosphorylated calcium/calmodulin-dependent protein kinase II to the postsynaptic density. *The Journal of Biological Chemistry* 272(21):13467–13470. 00280. 316  
317
40. Huang Kx, Paudel HK (2000) Ser67-phosphorylated inhibitor 1 is a potent protein phosphatase 1 inhibitor. *Proceedings of the National Academy of Sciences* 97(11):5824–5829. 00064. 318  
319
41. Hemmings HC, Greengard P, Tung HYL, Cohen P (1984) DARPP-32, a dopamine-regulated neuronal phosphoprotein, is a potent inhibitor of protein phosphatase-1. *Nature* 310(5977):503–505. 00571. 320  
321
42. Siddoway BA, et al. (2013) An Essential Role for Inhibitor-2 Regulation of Protein Phosphatase-1 in Synaptic Scaling. *The Journal of Neuroscience* 33(27):11206–11211. 00013. 322  
323
43. Erban R, Chapman J, Maini P (2007) A practical guide to stochastic simulations of reaction-diffusion processes. *arXiv:0704.1908 [physics, q-bio]*. 00139 arXiv: 0704.1908. 324  
325
44. Isaacson S (2009) The Reaction-Diffusion Master Equation as an Asymptotic Approximation of Diffusion to a Small Target. *SIAM Journal on Applied Mathematics* 70(1):77–111. 00112. 326  
327
45. Erban R, Chapman SJ (2009) Stochastic modelling of reaction–diffusion processes: algorithms for bimolecular reactions. *Physical Biology* 6(4):046001. 00227. 328  
329
46. Ray S, Bhalla US (2008) PyMOOSE: Interoperable Scripting in Python for MOOSE. *Frontiers in Neuroinformatics* 2. 00055. 330
47. Farley M (2015) Ph.D. thesis (University of Texas, Texas, United States). 331
48. Koninck PD, Schulman H (1998) Sensitivity of CaM Kinase II to the Frequency of Ca<sup>2+</sup> Oscillations. *Science* 279(5348):227–230. 01256. 332
49. Stemmer PM, Klee CB (1994) Dual Calcium Ion Regulation of Calcineurin by Calmodulin and Calcineurin B. *Biochemistry* 33(22):6859–6866. 00281. 333  
334
50. Hanson PI, Meyer T, Stryer L, Schulman H (1994) Dual role of calmodulin in autophosphorylation of multifunctional cam kinase may underlie decoding of calcium signals. *Neuron* 12(5):943–956. 00425. 335  
336
51. Ichikawa K, et al. (1996) Interactions and Properties of Smooth Muscle Myosin Phosphatase. *Biochemistry* 35(20):6313–6320. 00095. 337
52. Endo S, Zhou X, Connor J, Wang B, Shenolikar S (1996) Multiple Structural Elements Define the Specificity of Recombinant Human Inhibitor-1 as a Protein Phosphatase-1 Inhibitor. *Biochemistry* 35(16):5220–5228. 00171. 338  
339
53. Ehlers MD (2003) Activity level controls postsynaptic composition and signaling via the ubiquitin-proteasome system. *Nature Neuroscience* 6(3):231–242. 00881. 340  
341

**Table 1. Table of parameters used in model.**

| Symbol              | Parameter                                                   | Value                                                 | Ref/Notes                                                                            |
|---------------------|-------------------------------------------------------------|-------------------------------------------------------|--------------------------------------------------------------------------------------|
| $V_{\text{Spine}}$  | Volume of Spine                                             | $1 \text{ to } 5 \times 10^{-20} \text{ m}^3$         | (14)                                                                                 |
| $V_{\text{PSD}}$    | Volume of PSD                                               | $1 \text{ to } 5 \times 10^{-21} \text{ m}^3$         | Thickness $\sim 100 \text{ nm}$<br>(47), Surface area $\sim 0.05 \mu\text{m}^2$ (14) |
| $N_{\text{CaMKII}}$ | Total CaMKII holoenzymes in PSD/Spine                       | $100 \pm 18$                                          | (47)                                                                                 |
| $N_{\text{PP1}}$    | Total PP1 in PSD                                            | $4 \text{ to } 20 \times N_{\text{CaMKII}}$           | This paper                                                                           |
|                     | Total PP1 in Spine                                          | $10 \text{ to } 100 \times N_{\text{CaMKII}}$         | This paper                                                                           |
| $I1$                | Concentration of free I1                                    | $0.1 \mu\text{M}$                                     | (18)                                                                                 |
| $V_{\text{CaN}}$    | Activity of calcineurin divided by its Michaelis constant   | $1.0 \text{ s}^{-1}$                                  | (18)                                                                                 |
| $V_{\text{CaM}}$    | Activity of PKA divided by its Michaelis constant           | $1.0 \text{ s}^{-1}$                                  | (18)                                                                                 |
| $K_M$               | The Michaelis constant of PP1                               | $10 \mu\text{M}$                                      | $0.4 \text{ to } 20 \mu\text{M}$ (17)                                                |
| $K_{H1}$            | Hill constant of CaMKII ( $\text{Ca}^{2+}$ activation)      | $0.7 \mu\text{M}$                                     | (48)                                                                                 |
| $n_{H1}$            | Hill coefficient of CaMKII ( $\text{Ca}^{2+}$ activation)   | 3                                                     | (49)                                                                                 |
| $K_{H2}$            | Hill constant of calcineurin ( $\text{Ca}^{2+}$ activation) | $0.3 \mu\text{M}$                                     | (49)                                                                                 |
| $n_{H2}$            | Hill constant of calcineurin ( $\text{Ca}^{2+}$ activation) | 3                                                     | (49)                                                                                 |
| $k_1$               | The catalytic constant of autophosphorylation               | $1.5 \text{ s}^{-1}$                                  | (50)                                                                                 |
| $k_2$               | The catalytic constant of protein phosphatase               | $10 \text{ s}^{-1}$                                   | (19, 51)                                                                             |
| $k_3$               | The association rate constant of PP1.I1P complex            | $100 \mu\text{M}^{-1} \text{ s}^{-1}$                 | (18, 52)                                                                             |
| $k_4$               | The dissociation rate constant of PP1.I1P complex           | $0.1 \text{ s}^{-1}$                                  | (18, 52)                                                                             |
| $k_x^+$             | The rate of adding unphosphorylated subunit x               | $0.1 / s / N_{\text{CaMKII}}$                         | This paper                                                                           |
| $k_y^+$             | The rate of adding phosphorylated subunit y                 | $0.1 / s / N_{\text{CaMKII}}$                         | This paper                                                                           |
| $k_x^-$             | The rate of losing unphosphorylated subunit x               | $1 \text{ s}^{-1}$                                    | This paper                                                                           |
| $k_y^-$             | The rate of losing phosphorylated subunit y                 | $1 \text{ s}^{-1}$                                    | This paper                                                                           |
| $v_t$               | Turnover rate of CaMKII                                     | $30 \text{ h}^{-1}$                                   | (18, 53)                                                                             |
| $D_{\text{PP1}}$    | Diffusion coefficient of PP1                                | $0.5 \mu\text{m}^2 \text{ s}^{-1}$                    | This paper and (33)                                                                  |
| $D_{\text{sub}}$    | Diffusion coefficient of CaMKII subunits                    | $10^{-5} \text{ to } 10 \mu\text{m}^2 \text{ s}^{-1}$ | This paper                                                                           |
